# Supplementary material for: Aerial Drone Surveys Reveal the Efficacy of a Protected Area Network for Marine Megafauna and the Value of Sea Turtles as Umbrella Species
Source: MDPI journal article supplement (doi:10.3390/drones6100291), 2022-10-07
Supplement: s1 [file s1]

Archive with 1 entries (1 files):
- drones-1908702-supplementary.pdf
